# Supplementary material for: Vanadium complexes with multidentate amine bisphenols
Source: Royal Society of Chemistry journal article supplement (doi:10.1039/c4dt01007h), 2014-01-01
Supplement: c4dt01007h1.pdf [file c4dt01007h1.pdf]

Electronic supplementary material

### Vanadium complexes with multidentate amine bisphenols

M.M. Hänninen,<sup>a</sup> A. Peuronen,<sup>a</sup> P. Damlin,<sup>b</sup> V. Tyystjärvi,<sup>b</sup> H. Kivelä,<sup>b</sup> A. Lehtonen<sup>b\*</sup>

<sup>a</sup> Laboratory of Inorganic Chemistry, Department of Chemistry, University of Jyväskylä, FI-40014 Jyväskylä, Finland

<sup>b</sup> Laboratory of Materials Chemistry and Chemical Analysis, Department of Chemistry, University of Turku, FI-20014, Turku, Finland.

The reaction of glycine bisphenol  $H_3L^1$  with a V(V) precursor  $[VO(OPr)_3]$  was carried out in various solvents (MeCN, MeOH, EtOH, Et<sub>2</sub>O, PhMe). The only characterizable product was mechanically isolated from the mixture, which deposited from the methanol solution.

260 mg (0.51 mmol) of  $H_3L^1$  and 120  $\mu$ l of  $[VO(OPr)_3]$  (124 mg, 0.51 mmol) was dissolved in 5 ml of methanol to have a dark solution. The reaction mixture was kept at room temperature for a week while some (ca. 120 mg) crystalline deposition was formed. A selected dark red crystal was analysed by X-ray diffractometry. The oxidation state of the vanadium centre was confirmed by cyclic voltammetry, which show an irreversible one-electron reduction at  $E_{1/2} = -0.96$  V.

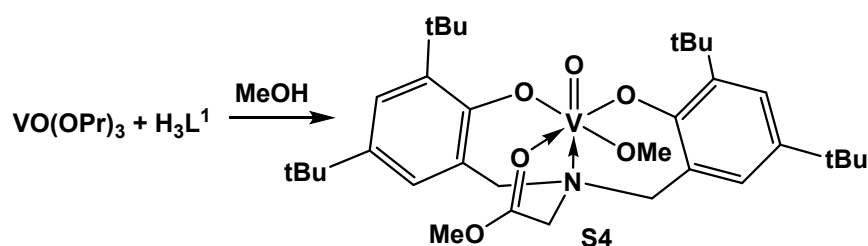

**Crystal data for S4.**  $C_{34}H_{52}NO_6V$ ,  $M = 621.71$ , triclinic,  $a = 9.35040(10)$ ,  $b = 12.4992(2)$ ,  $c = 15.3633(2)$  Å,  $\alpha = 106.2400(10)$ ,  $\beta = 102.8943(25)$ ,  $\gamma = 91.5820(10)^\circ$ ,  $V = 1671.58(4)$  Å<sup>3</sup>, space group  $P-1$  (no. 2),  $Z = 2$ ,  $\mu(\text{MoK}\alpha) = 3.400$  mm<sup>-1</sup>, 26912 reflections measured, 6518 unique ( $R_{int} = 0.0358$ ), which were used in all calculations. Multi-scan absorption correction made.  $T_{min}$  and  $T_{max}$  were 0.6662 and 0.7455, respectively. Final  $R_1 = 0.0378$ ,  $wR_2 = 0.0918$ , GOF = 1.077. Minimum and maximum residual electron densities are 0.322 and -0.310 e Å<sup>-3</sup>, respectively.

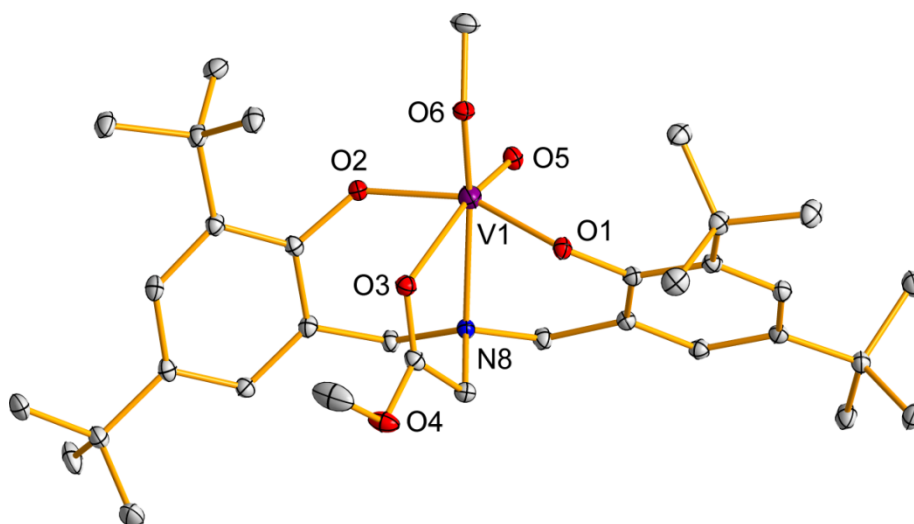

**Figure S1.** The molecular structure of **S4**. Hydrogen atoms are omitted for clarity.

**Table S1.** Selected bond lengths [Å] and bond angles [°] in **S4**.

|        |            |           |            |
|--------|------------|-----------|------------|
| V1-O1  | 1.5903(12) | O1-V1-O2  | 100.15(6)  |
| V1-O2  | 1.8599(11) | O1-V1-O3  | 97.48(6)   |
| V1-O3  | 1.8735(11) | O1-V1-O4  | 165.59(5)  |
| V1-O4  | 2.3561(12) | O1-V1-O6  | 104.30(6)  |
| V1-O6  | 1.7848(11) | O1-V1-N8  | 92.56(6)   |
| V1-N8  | 2.2759(14) | O6-V1-N8  | 162.90(5)  |
| O2-C1  | 1.354(2)   | V1-O2-C1  | 126.59(10) |
| O3-C15 | 1.3475(19) | V1-O3-C15 | 131.73(10) |
| O4-C17 | 1.214(2)   | V1-O4-C17 | 113.06(11) |
| O6-C34 | 1.417(2)   | V1-O6-C34 | 127.98(12) |
